# Supplementary material for: Enhancement of photocatalytic NO removal activity of g-C3N4 by modification with illite particles
Source: Royal Society of Chemistry journal article supplement (doi:10.1039/d0en00415d), 2020-01-01
Supplement: d0en00415d1.pdf [file d0en00415d1.pdf]

## Supporting Information

### Enhancement of photocatalytic NO removal activity of g-C<sub>3</sub>N<sub>4</sub> by modification with illite particles

Xin Li,<sup>a</sup> Guohui Dong,\*<sup>a</sup> Fengjiao Guo,<sup>b</sup> Pengfei Zhu,<sup>a</sup> Yu Huang<sup>c</sup> and Chuanyi  
Wang<sup>a</sup>

<sup>a</sup> School of Environmental Science and Engineering, Shaanxi University of Science and Technology, Xi'an 710021, China

<sup>b</sup> School of Chemistry and Chemical Engineering, Xinjiang University, Urumqi 830046, China

<sup>c</sup>Key Laboratory of Aerosol Chemistry and Physics, Institute of Earth Environment, Chinese Academy of Sciences, Xi'an 710061, China

\*E-mail: [dongguohui@sust.edu.cn](mailto:dongguohui@sust.edu.cn) (Guohui Dong)

Tel: +86-029-86132765

#### The trapping experiment

Trapping experiment was used to investigate the NO removal mechanism in photocatalytic process. In NO removal experiments, potassium dichromate (K<sub>2</sub>Cr<sub>2</sub>O<sub>7</sub>), potassium iodide (KI), p-benzoquinone (PBQ) and tert-butyl alcohol (TBA) were used as scavenger for electrons (e<sup>-</sup>), holes (h<sup>+</sup>), superoxide free radicals (·O<sub>2</sub><sup>-</sup>) and hydroxyl radicals (·OH), respectively. As shown in Fig. S1, both K<sub>2</sub>Cr<sub>2</sub>O<sub>7</sub> and KI could completely inhibit the NO removal activity of g-C<sub>3</sub>N<sub>4</sub> and CN-IL<sub>5</sub>, indicating

both  $e^-$  and  $h^+$  are significant reactive species in the NO removal process. As for PBQ, it inhibited the activity of  $g-C_3N_4$  and depressed part of activity of  $CN-IL_5$ , suggesting  $\cdot O_2^-$  would affect both of  $g-C_3N_4$  and  $CN-IL_5$ , however, which was more critical for  $CN$ . Adding TBA had weak influence in  $g-C_3N_4$  system, while it reduced the activity of  $CN-IL_5$  significantly, suggesting  $\cdot OH$  was a crucial reactive species for  $CN-IL_5$ .

### Hydroxyl radicals production test

Under aerobic conditions, Sodium terephthalate solution was applied as a fluorescent agent, and 50 mg of the sample was dispersed in 100 ml of fluorescent agent. Then the suspension was fully stirred for 10 min under dark conditions to reach adsorption equilibrium. After this process the beaker was illuminated under a xenon lamp equipped with a 420 nm filter, taking 4 ml of the suspension with a syringe every 10 min and filtering it through the filter membrane to obtain a clear solution. The clear solution was tested the fluorescence performance using 312 nm as the excitation light source with the scanning range of 330-600 nm.

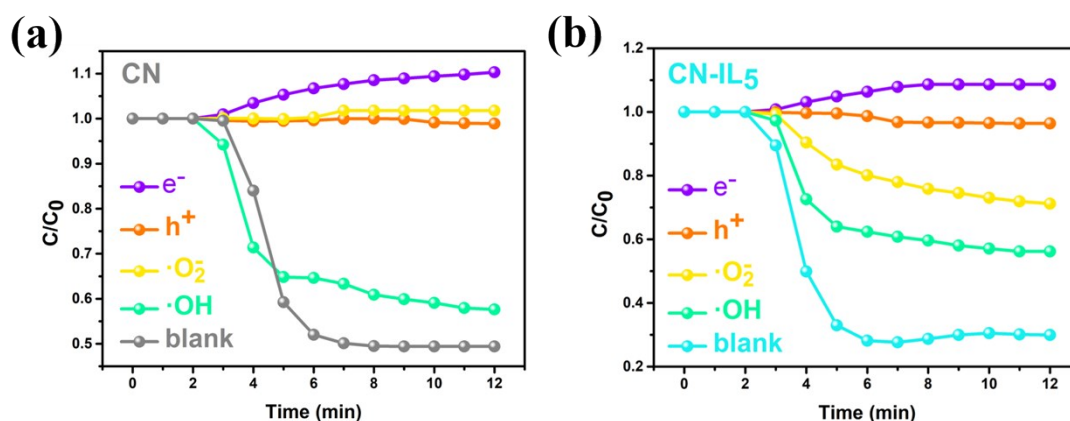

Fig. S1 Trapping experiments for (a)  $g-C_3N_4$ ; (b)  $CN-IL_5$ .

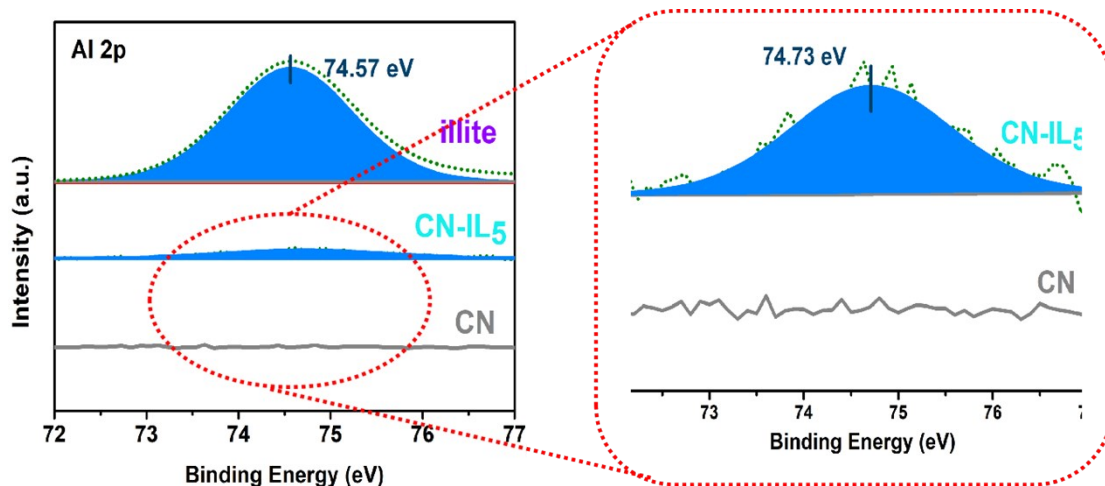

Fig. S2 Al 2p and its enlarged spectra.

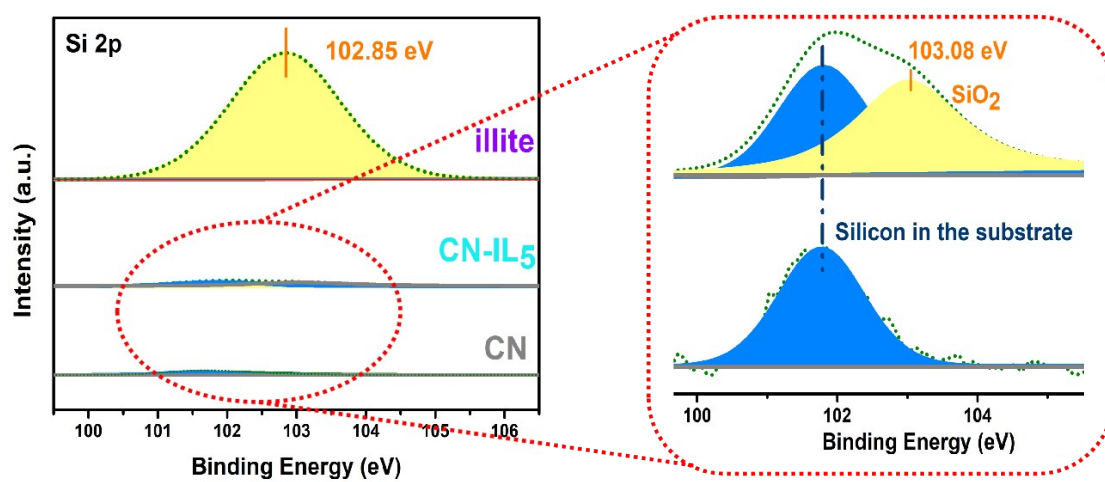

Fig. S3 Si 2p and its enlarged spectra.

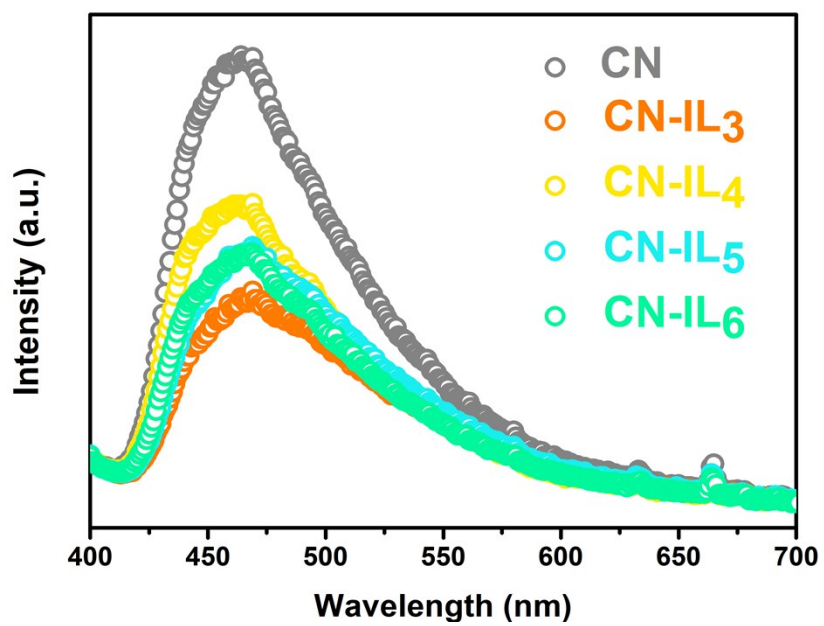

Fig. S4 Fluorescence emission spectra of all samples.

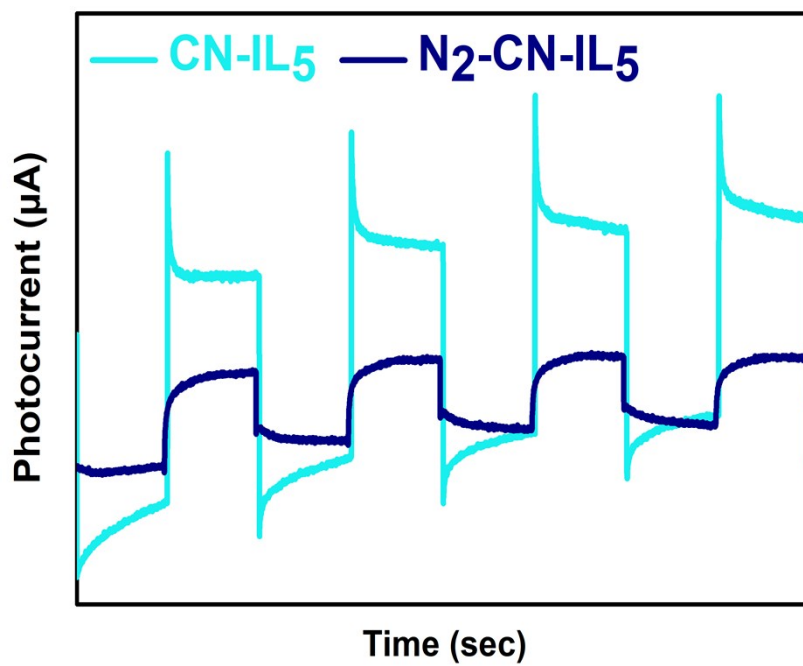

Fig. S5 Photocurrent of CN-IL<sub>5</sub> in the argon atmosphere.

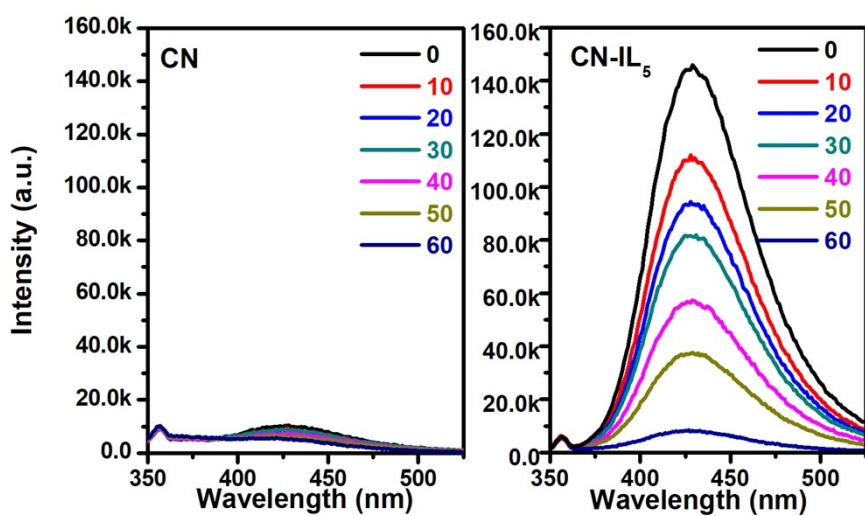

Fig. S6 The generated  $\cdot\text{OH}$  in CN and CN-IL systems.

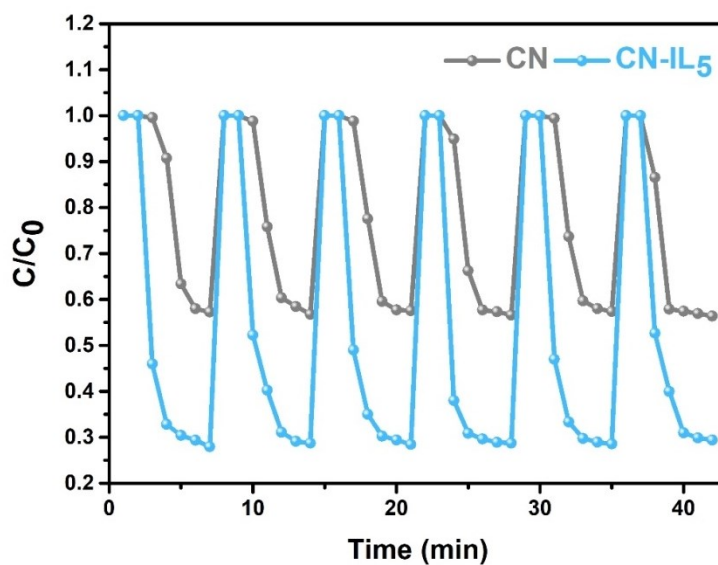

Fig. S7 The stability of CN and CN-IL5 samples.
